# Supplementary material
Source: PubMed Central journal article supplement (PMC4311194)
Supplement: supp_tpc.114.129601_tpc129601_SupplementalDataRev.pdf [file supp_tpc.114.129601_tpc129601_SupplementalDataRev.pdf]

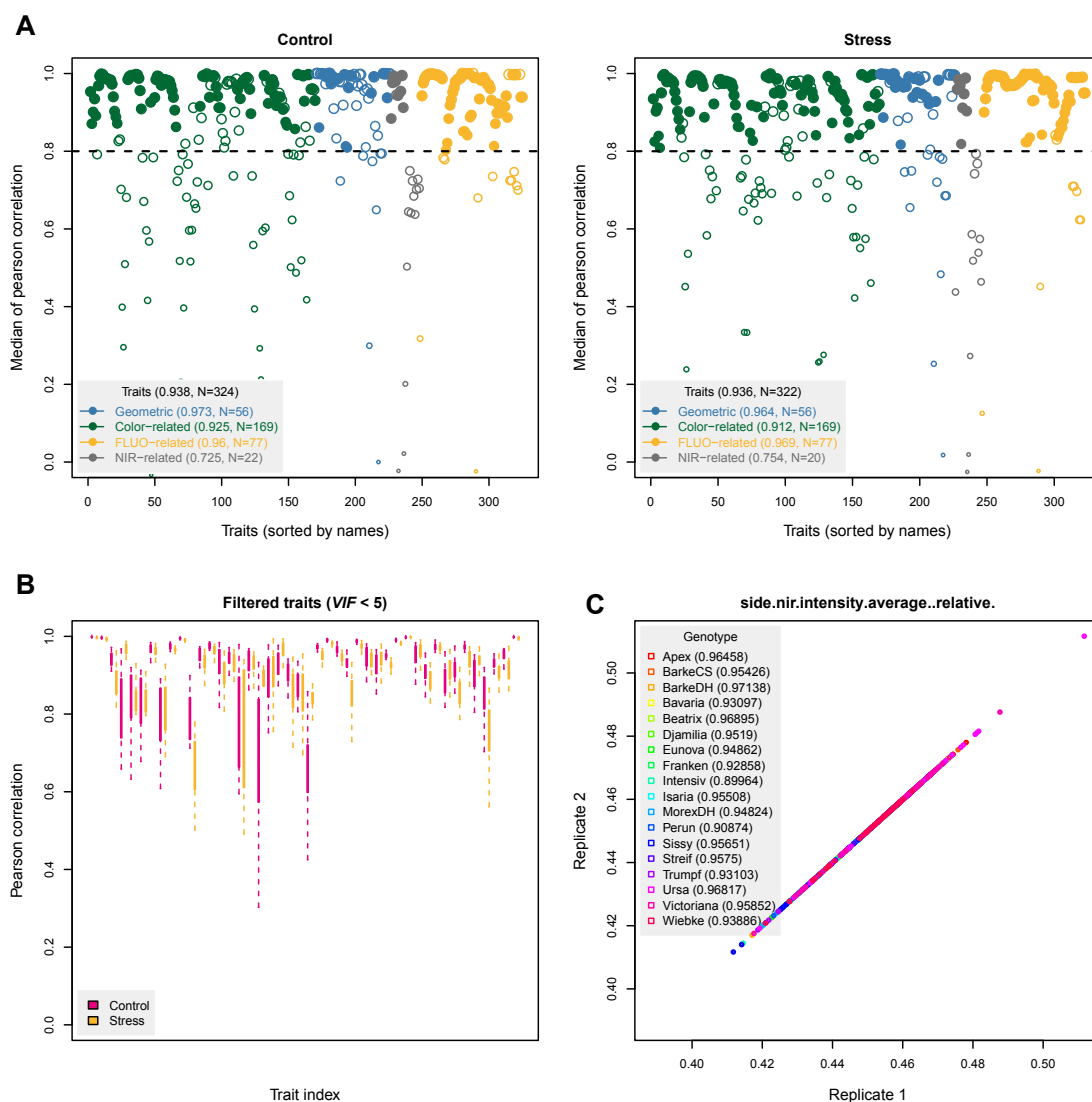

**Supplemental Figure 1. Reproducibility of phenotypic traits.**

(A) Highly reproducible analysis of phenotypic traits based on control (left) and stressed plants (right). Replicate plants with the same genotype and treatment were used to assess the reproducibility of traits based on Pearson's correlation ( $r > 0.8$ ). Besides, the correlation in replicate plants is considered to be significant higher than by chance ( $P < 0.001$ ; see **Methods**). Filled dots represent the filtered traits with high reproducibility ( $r > 0.8$  and  $P < 0.001$ ). The median values of Pearson's correlation for each trait categories are indicated. The number of traits with non-empty values is provided as well. The trait reproducibility is consistence between control and stressed plants. (B) The reproducibility of the 54 filtered traits. (C) An example of highly reproducible traits: the NIR-intensity trait.

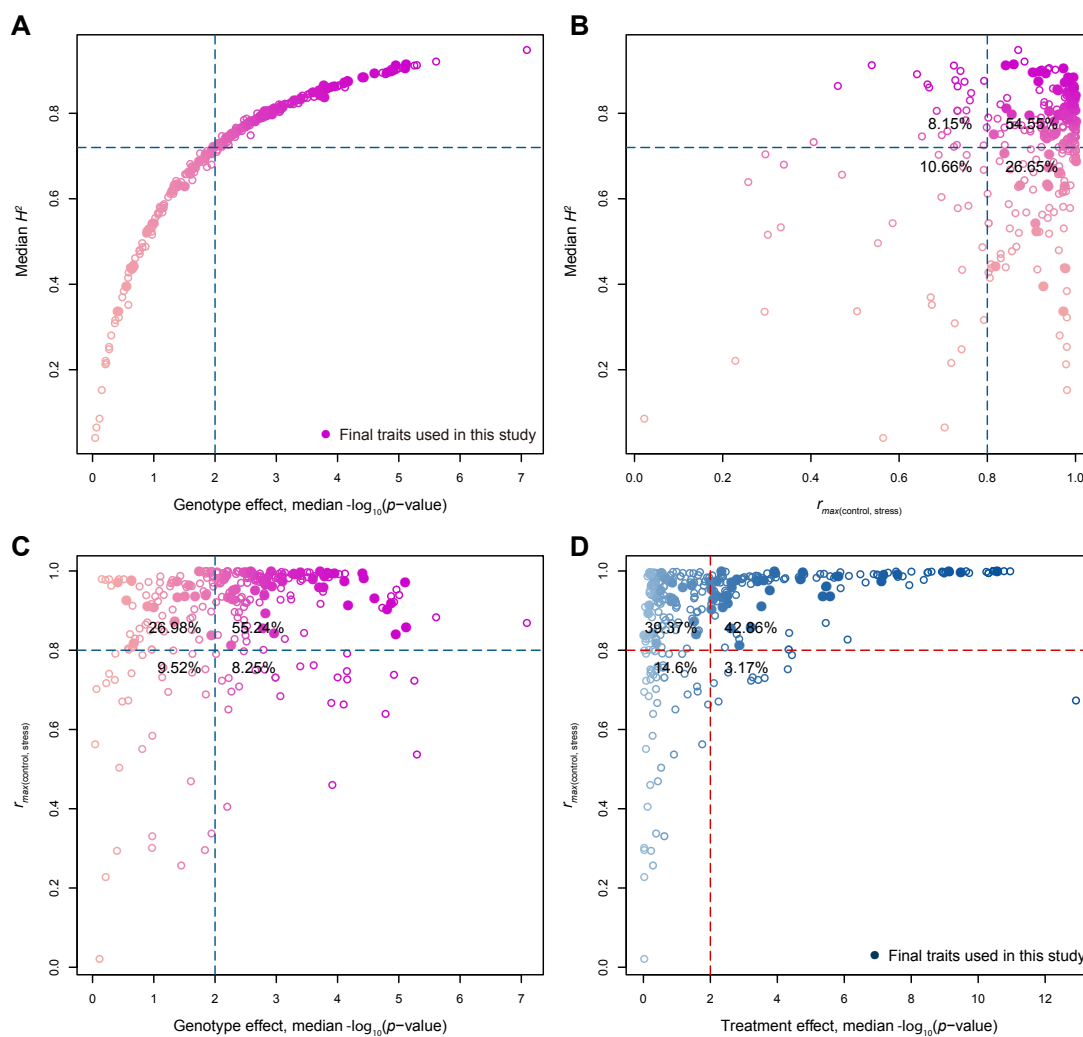

**Supplemental Figure 2. Assessment of trait reproducibility analysis.**

For all the plots, each point represents one trait. Filled circles indicate the final 54 traits used in this study. The dash lines indicate the corresponding cut-offs. **(A)** Scatter plot showing genotype effect (median negative log-transformed p-values) versus heritability ( $H^2$ ). **(B)** Scatter plot of trait reproducibility (the maximum correlation value in either control or stress treatments) and  $H^2$ . **(C)** Scatter plot of genotype effect and trait reproducibility. **(D)** Scatter plot of treatment effect and trait reproducibility.

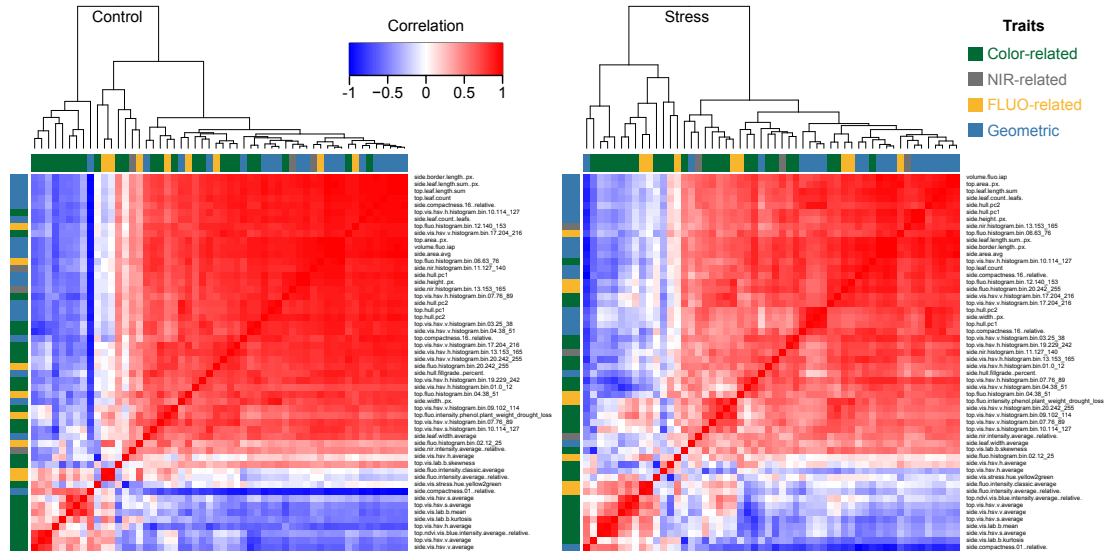

**Supplemental Figure 3. Trait similarity.**

Canonical correlation analysis of phenotypic traits based on control (left) and stressed plants (right). Heatmap plot is organized by hierarchical clustering with the tree (top). Traits are listed on the right.

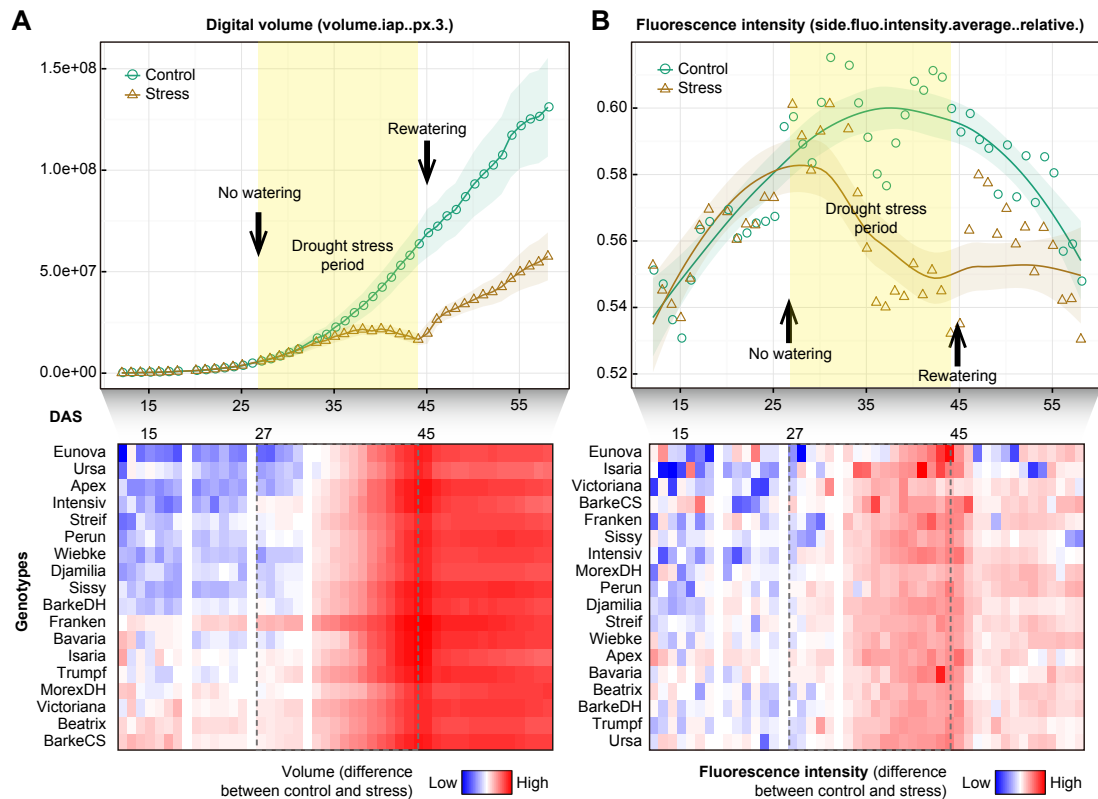

**Supplemental Figure 4. Phenotypic traits revealing the stress symptom; related to Figure 4D.**

Top: Examples show the trait of (A) “digital volume” and (B) “fluorescence intensity” over time. Bottom: heatmap shows the difference in traits, measured by the ratio values, between control and stressed plants. Blue indicates low difference, whereas red indicates high difference. Note: plants from different genotypes show different patterns.

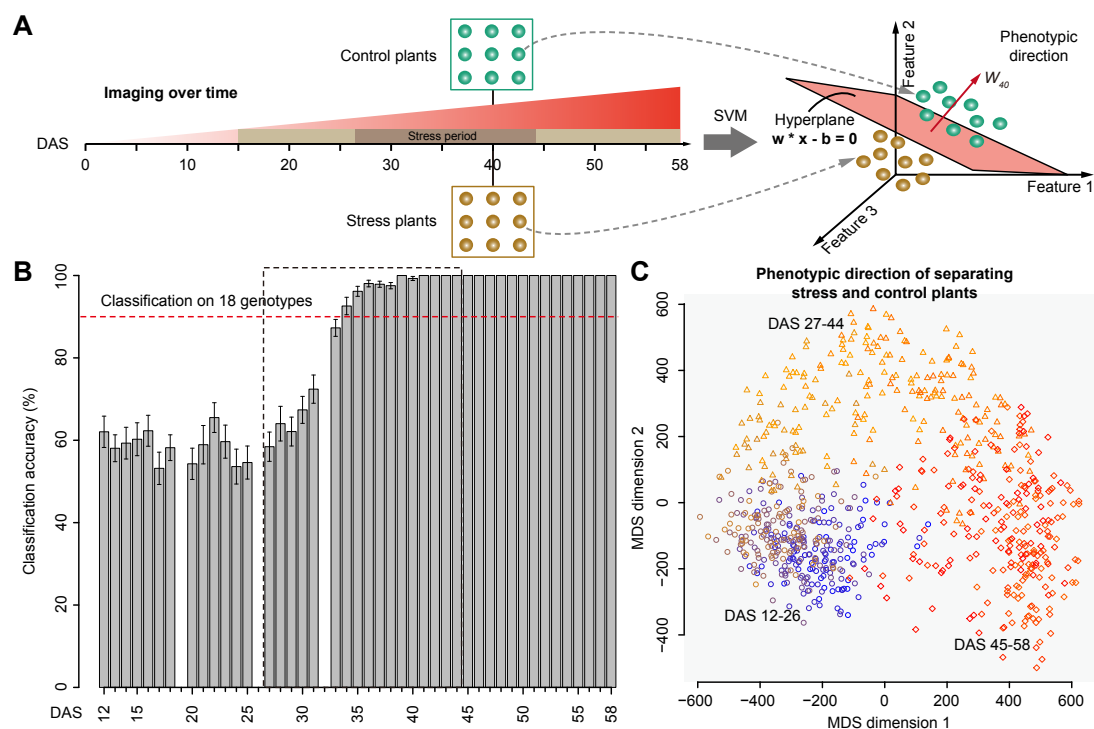

**Supplemental Figure 5. Classification of plants based on the SVM methodology.**

(A) An SVM-based methodology used for classification of plants with different treatments. Measurements of multidimensional traits (the highly reproducible traits) were used to represent plants in a high-dimensional feature space. An SVM-based classifier was used to determine the optimum hyperplane which separated plants into control and stress groups for each genotype from every daily imaging data (for example, in 40 days after sowing, DAS 40). Hyperplane orientation represented its weight vector ( $W_{40}$  for DAS 40), indicating the “phenotypic direction” of greatest separation between the two plant groups. (B) Classification accuracy to evaluate the performance of classification. Dashed line indicates classification accuracy of 90%. Stress period is indicated. Error bars, s.e.m. ( $n=18$ ). (C) Multidimensional scaling (MDS) plot showing the patterns of phenotypic direction over time. Each point represents the phenotypic direction for a specific genotype from a specific time point. Three distinct patterns were observed, corresponding to three different phases to the experiment.

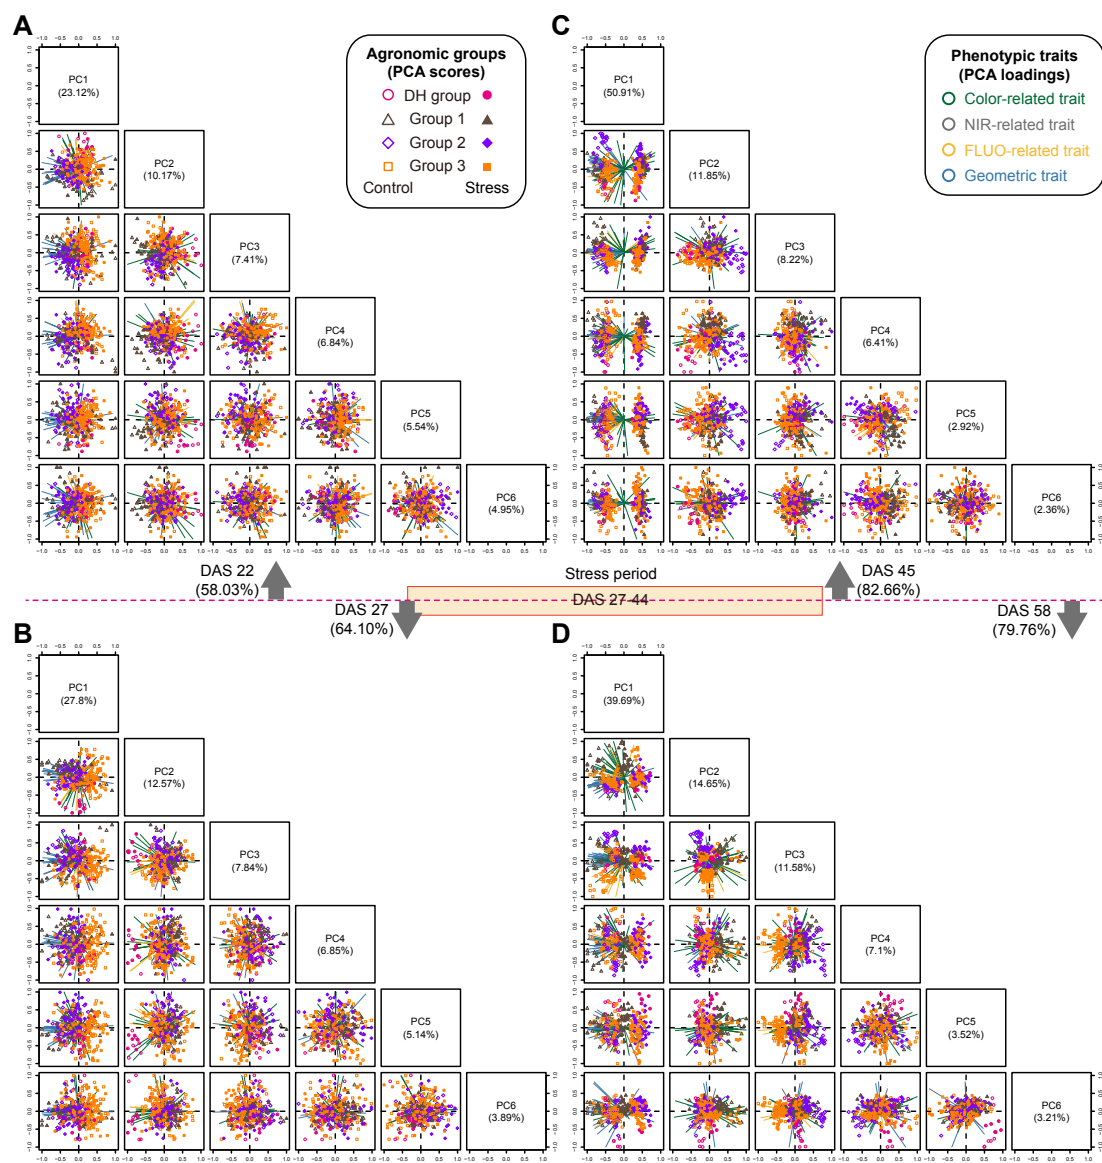

**Supplemental Figure 6. PCA performed over time; related to Figure 4B.**

Scatter plots show the top six PCs on (A) DAS 22, (B) 27, (C) 45 and (D) 58. The proportion of variance explained by the PCs is shown in parentheses. The component scores (dots) are coloured and shaped according to agronomic groups of plants. The loadings (lines) of each variable (traits) are coloured according to their categories.

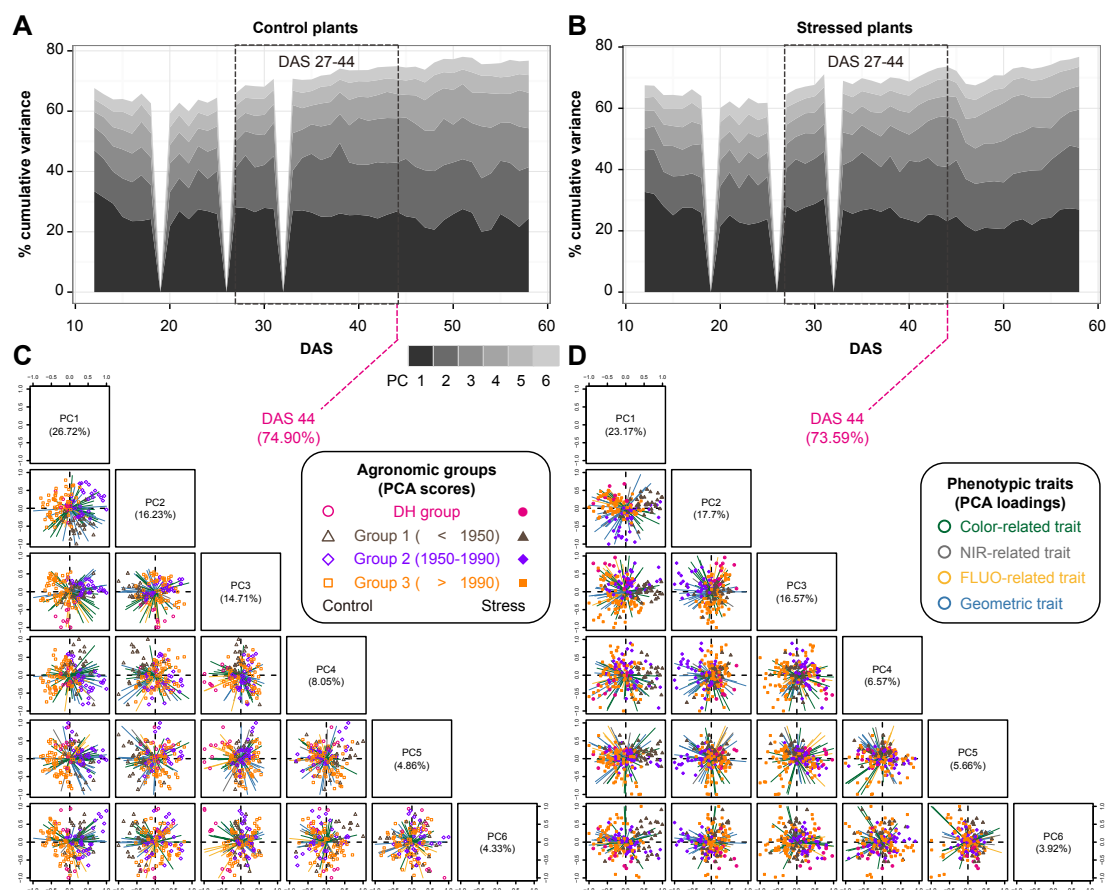

**Supplemental Figure 7. PCA performed on control and stressed plants, respectively; related to Figure 4.**

Principal component analysis (PCA) of phenotypic variance over time for control (A) and stressed plants (B). The percentage of total variance explained by the top six principal components is shown. The stress period is indicated by the dashed box. (C) and (D) Scatter plots showing the PCA results on DAS 44 (to compare the results of Figure 3). The first six PCs display 74.9% and 73.6% of the total phenotypic variance for control (C) and stressed plants (D), respectively. The component scores (shown in points) are coloured and shaped according to the agronomic groups (as legend listed in the box). The component loading vectors (represented in lines) of each variable (traits as coloured according to their categories) were superimposed proportionally to their contribution.

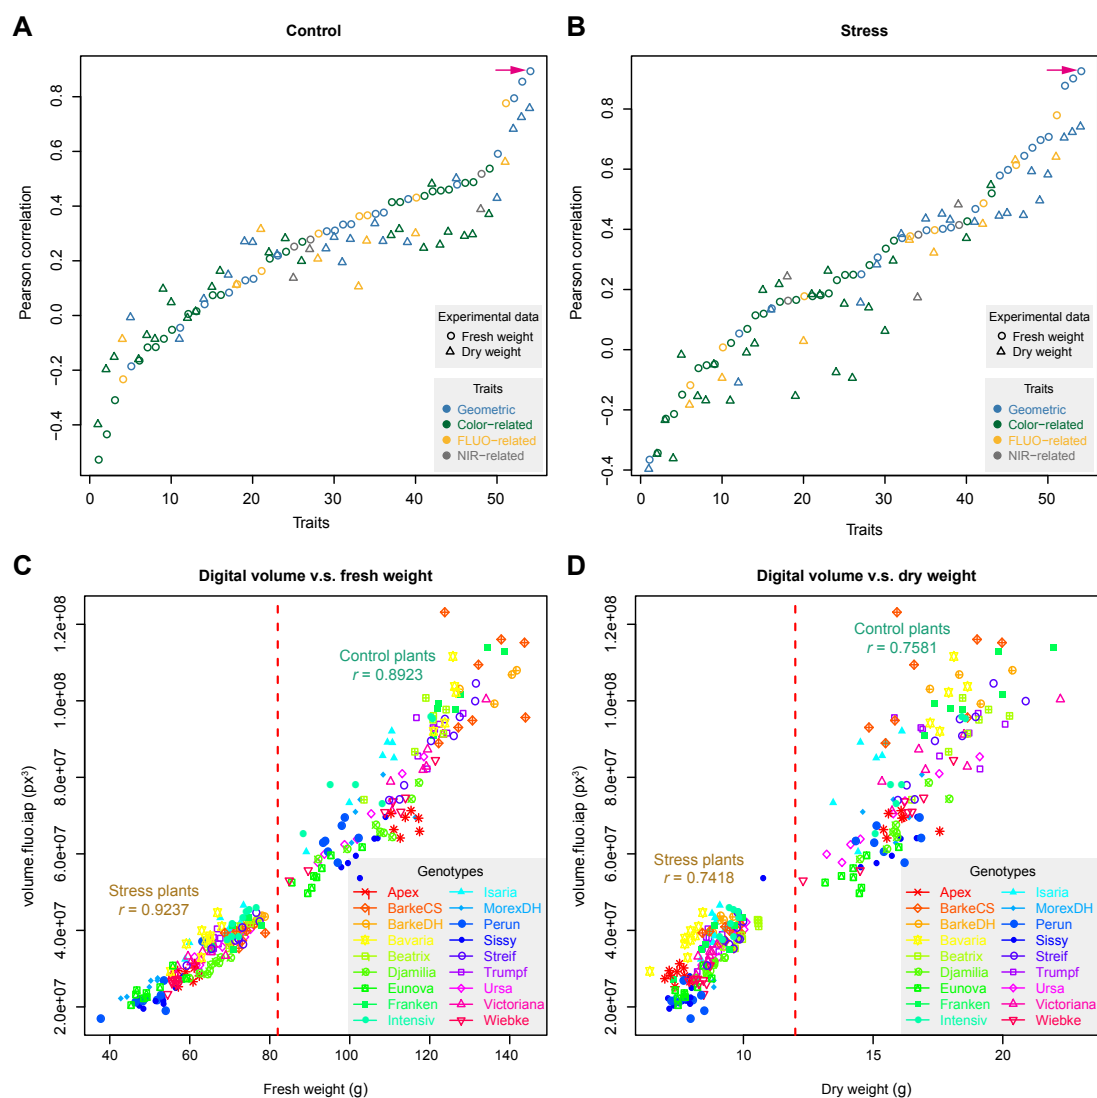

**Supplemental Figure 8. Correlation analysis of manual measurements with phenotypic traits.**

Correlation of all phenotypic traits with fresh weight and dry weight for control plants (**A**) and stressed plants (**B**). The digital volume has the best correlation with manually measured biomass. For **A** and **B**, traits are coloured according to their classification. Correlation analysis of digital volume with biomass for control plants (**C**) and stressed plants (**D**). For **C** and **D**, data points are coloured according to the genotype origin of plants. The correlation coefficients are indicated for stress and control plant, respectively.

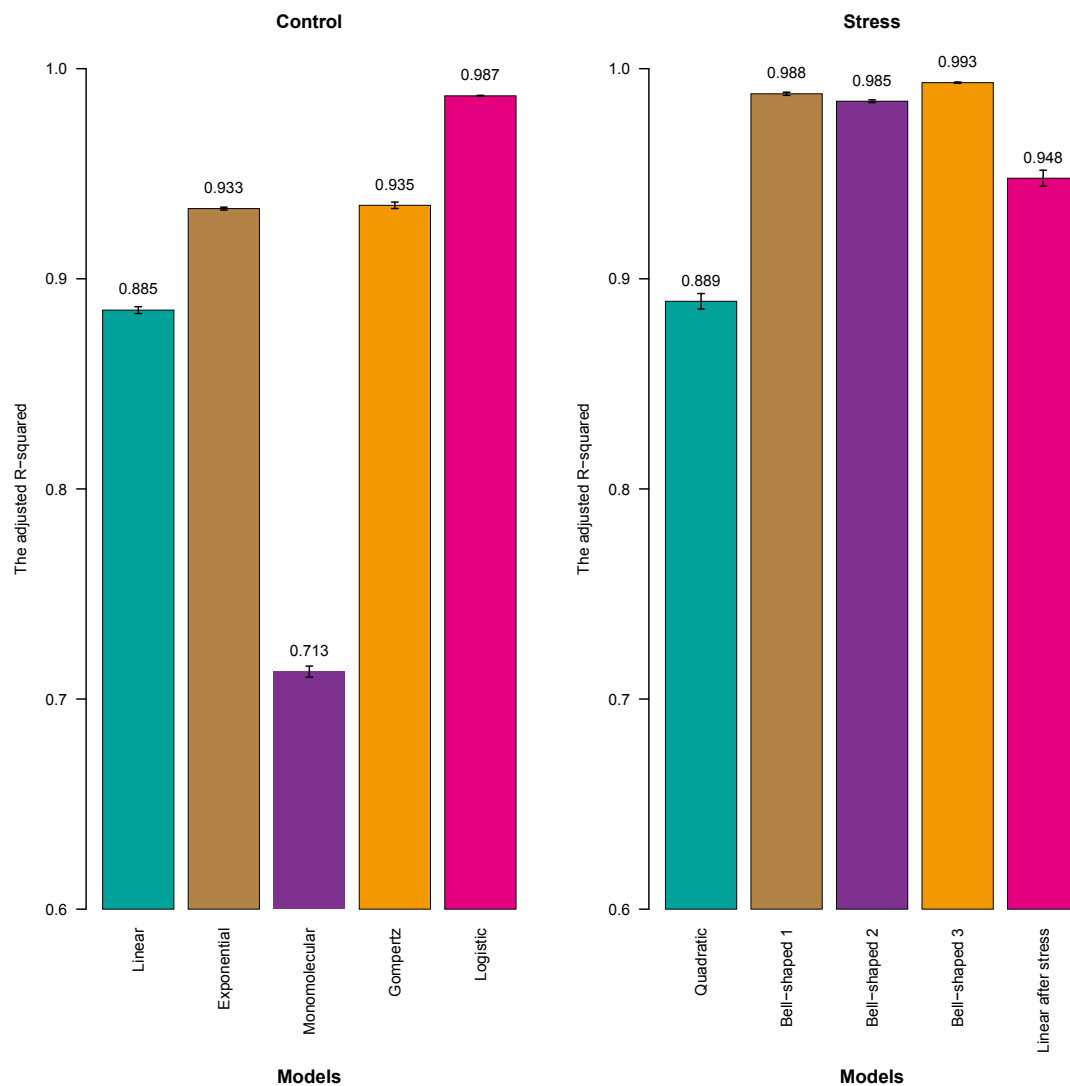

**Supplemental Figure 9. Evaluation of the performance of growth curves.**

Left: control plants; right: stressed plants. The quality of fit (the adjusted  $R^2$ ) for each model is indicated. The average value of the adjusted  $R^2$  is indicated. For control plants, Logistic model presents the best-fitted model. Bell-shape 3 is the best-fitted model to describe plant growth before recovery for stressed plants; while stressed plants follow a linear growth model after recovery. Error bars: s.e.m..



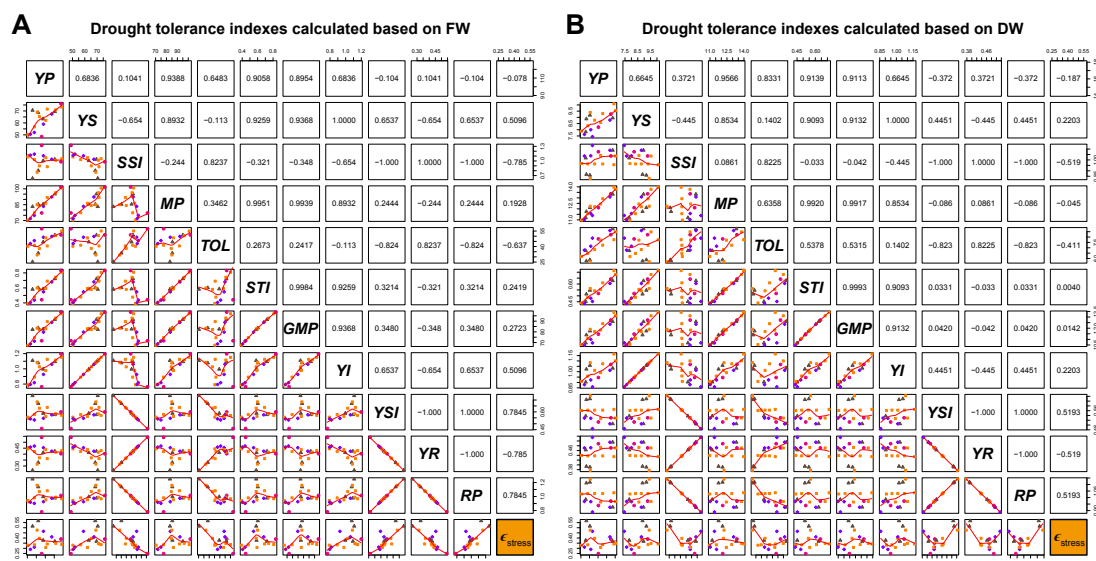

**Supplemental Figure 10. Comparison of stress elasticity and several drought tolerance indexes.**

Scatter plot showing pairwise comparison of stress elasticity ( $\epsilon_{stress}$ ) and eleven drought tolerance indexes. The drought tolerance indexes were calculated based on fresh weight (A) and dry weight (B). Pearson's correlation coefficients of these indexes are indicated in top-right quadrants. YP: biomass under control condition; YS: biomass under stress condition; SSI: stress susceptibility index (Fischer and Maurer, 1978); MP: mean productivity (Rosielle and Hamblin, 1981; Hossain et al., 1990); TOL: stress tolerance (Rosielle and Hamblin, 1981; Hossain et al., 1990); STI: stress tolerance index (Fernandez, 1992); GMP: geometric mean productivity (Fernandez, 1992); YI: yield index (Lin et al., 1986; Gavuzzi et al., 1997); YSI: yield stability index (Bousslama and Schapaugh, 1984; Fereres et al., 1986); YR: yield reduction ratio (Araghi and Assad, 1998); RP: relative performance (Abo-Elwafa and Bakheit, 1999).

## Supplemental Tables

**Supplemental Table 1.** The 54 investigated phenotypic traits in this study.

| Trait                                   | Description                                                                                                                                                                 | Category <sup>§</sup> | View <sup>¶</sup> | Camera <sup>¶</sup> |
|-----------------------------------------|-----------------------------------------------------------------------------------------------------------------------------------------------------------------------------|-----------------------|-------------------|---------------------|
| side.area                               | Projected area from side (filled pixels)                                                                                                                                    | Geometric             | Side              | VIS                 |
| side.border.length                      | Plant area border length                                                                                                                                                    | Geometric             | Side              | VIS                 |
| side.compactness.01.relative            | Geometric measure of plant compactness<br>$4 * \pi / (\text{whole border length from side}^2 / \text{projected side area})$                                                 | Geometric             | Side              | VIS                 |
| side.compactness.16.relative            | Geometric measure of plant compactness<br>whole border length from side <sup>2</sup> / projected side area                                                                  | Geometric             | Side              | VIS                 |
| side.fluo.histogram.bin.02.12_25        | Number of pixels in intensity bin 2 / 20 (low)                                                                                                                              | FLUO                  | Side              | FLUO                |
| side.fluo.histogram.bin.20.242_255      | Number of pixels in intensity bin 20/20 (high)                                                                                                                              | FLUO                  | Side              | FLUO                |
| side.fluo.intensity.average.relative    | Average intensity of the fluorescence reflection based on the color (pure red highest intensity, yellow lowest intensity)                                                   | FLUO                  | Side              | FLUO                |
| side.fluo.intensity.classic.average     | Average intensity of the fluorescence reflection based on the color and brightness (pure red highest intensity, yellow lowest intensity, value is scaled by the brightness) | FLUO                  | Side              | FLUO                |
| side.height                             | Plant height (px or mm)                                                                                                                                                     | Geometric             | Side              | VIS                 |
| side.hull.fillgrade.percent             | Projected area / area of convex hull                                                                                                                                        | Geometric             | Side              | VIS                 |
| side.hull.pc1                           | Largest distance between any plant pixels from side view (these pixels are the base for the 'maximum distance line')                                                        | Geometric             | Side              | VIS                 |
| side.hull.pc2                           | Sum of the maximum distance of pixels left and right to the 'maximum distance line'                                                                                         | Geometric             | Side              | VIS                 |
| side.leaf.count.leaves                  | Estimated leaf count, based on the number of end points of the plant skeleton                                                                                               | Geometric             | Side              | VIS                 |
| side.leaf.length.sum                    | Length of the plant skeleton                                                                                                                                                | Geometric             | Side              | VIS                 |
| side.leaf.width.average                 | Average distance of plant pixels to the nearest skeleton pixel                                                                                                              | Geometric             | Side              | VIS                 |
| side.nir.histogram.bin.11.127_140       | Number of pixels with NIR intensity in the range of 127-140 (0 no intensity, 255 highest intensity)                                                                         | NIR                   | Side              | NIR                 |
| side.nir.histogram.bin.13.153_165       | Number of pixels with NIR intensity in the range of 153-165 (0 no intensity, 255 highest intensity)                                                                         | NIR                   | Side              | NIR                 |
| side.nir.intensity.average.relative     | Average near-infrared intensity of plant pixels (0..255, 0 no intensity, 255 highest intensity)                                                                             | NIR                   | Side              | NIR                 |
| side.vis.hsv.h.average                  | Average hue of plant pixels                                                                                                                                                 | Color                 | Side              | VIS                 |
| side.vis.hsv.h.histogram.bin.01.0_12    | Number of plant pixels within specific hue range                                                                                                                            | Color                 | Side              | VIS                 |
| side.vis.hsv.h.histogram.bin.13.153_165 | Number of plant pixels within specific hue range                                                                                                                            | Color                 | Side              | VIS                 |
| side.vis.hsv.s.average                  | Average plant pixels color saturation                                                                                                                                       | Color                 | Side              | VIS                 |
| side.vis.hsv.v.average                  | Average brightness                                                                                                                                                          | Color                 | Side              | VIS                 |
| side.vis.hsv.v.histogram.bin.04.38_51   | Number of plant pixels with brightness in specific range                                                                                                                    | Color                 | Side              | VIS                 |
| side.vis.hsv.v.histogram.bin.17.204_216 | Number of plant pixels with brightness in specific range                                                                                                                    | Color                 | Side              | VIS                 |
| side.vis.hsv.v.histogram.bin.20.242_255 | Number of plant pixels with brightness in specific range                                                                                                                    | Color                 | Side              | VIS                 |
| side.vis.lab.b.kurtosis                 | „Peakedness“ of the b* (blue to yellow) values of the plant color histogram, calculated in the L*a*b*-color space                                                           | Color                 | Side              | VIS                 |
| side.vis.lab.b.mean                     | Average color in the b* range of the L*a*b* color space (blue to yellow)                                                                                                    | Color                 | Side              | VIS                 |

|                                                     |                                                                                                                     |           |      |      |
|-----------------------------------------------------|---------------------------------------------------------------------------------------------------------------------|-----------|------|------|
| side.vis.stress.hue.yellow2green                    | Yellow to green ratio of plant pixels (based on according HSV hue classes)                                          | Color     | Side | VIS  |
| side.width                                          | Horizontal extend of the plant                                                                                      | Geometric | Side | VIS  |
| top.area                                            | Projected area from top view (filled pixels)                                                                        | Geometric | Top  | VIS  |
| top.compactness.16.relative.                        | Geometric measure of plant compactness<br>(whole border length from side) <sup>2</sup> / projected side area        | Geometric | Top  | VIS  |
| top.fluo.histogram.bin.04.38_51                     | Number of pixels in intensity bin 4/20 (rel. low)                                                                   | FLUO      | Top  | FLUO |
| top.fluo.histogram.bin.06.63_76                     | Number of pixels in intensity bin 6/20 (rel. middle)                                                                | FLUO      | Top  | FLUO |
| top.fluo.histogram.bin.12.140_153                   | Number of pixels in intensity bin 4/20 (rel. high)                                                                  | FLUO      | Top  | FLUO |
| top.fluo.intensity.phenol.plant_weight_drought_loss | Top plant area reduced by a penalty term for yellowish plant parts (drought stressed leaf areas appear yellowish)   | FLUO      | Top  | FLUO |
| top.hull.pc1                                        | Largest distance between any plant pixels from top view (these pixels are the base for the 'maximum distance line') | Geometric | Top  | VIS  |
| top.hull.pc2                                        | Sum of the maximum distance of pixels left and right to the 'maximum distance line'                                 | Geometric | Top  | VIS  |
| top.leaf.count                                      | Estimated number of leafs (skeleton based)                                                                          | Geometric | Top  | VIS  |
| top.leaf.length.sum                                 | Length of plant pixel skeleton                                                                                      | Geometric | Top  | VIS  |
| top.ndvi.vis.blue.intensity.average.relative.       | Average blue intensity in the RGB color space                                                                       | Color     | Top  | VIS  |
| top.vis.hsv.h.average                               | Average hue in the HSV color space                                                                                  | Color     | Top  | VIS  |
| top.vis.hsv.h.histogram.bin.07.76_89                | Number of pixels in bin 7/20 of the hue histogram (yellow to green)                                                 | Color     | Top  | VIS  |
| top.vis.hsv.h.histogram.bin.10.114_127              | Number of pixels in bin 10/20 of the hue histogram (green to blue)                                                  | Color     | Top  | VIS  |
| top.vis.hsv.h.histogram.bin.19.229_242              | Number of pixels in bin 19/20 of the hue histogram (red)                                                            | Color     | Top  | VIS  |
| top.vis.hsv.s.average                               | Average plant pixel color saturation                                                                                | Color     | Top  | VIS  |
| top.vis.hsv.s.histogram.bin.10.114_127              | Number of pixels in bin 10/20 of the saturation histogram (middle)                                                  | Color     | Top  | VIS  |
| top.vis.hsv.v.average                               | Average brightness                                                                                                  | Color     | Top  | VIS  |
| top.vis.hsv.v.histogram.bin.03.25_38                | Number of pixels with brightness in a specific range (bin 3/20, low)                                                | Color     | Top  | VIS  |
| top.vis.hsv.v.histogram.bin.07.76_89                | Number of pixels with brightness in a specific range (bin 7/20, middle)                                             | Color     | Top  | VIS  |
| top.vis.hsv.v.histogram.bin.09.102_114              | Number of pixels with brightness in a specific range (bin 9/20, middle)                                             | Color     | Top  | VIS  |
| top.vis.hsv.v.histogram.bin.17.204_216              | Number of pixels with brightness in a specific range (bin 17/20, high)                                              | Color     | Top  | VIS  |
| top.vis.lab.b.skewness                              | Asymmetry of the b* (blue to yellow) values of the plant color histogram, calculated within the L*a*b*-color space  | Color     | Top  | VIS  |
| volume.fluo.iap                                     | Estimated digital volume (px <sup>3</sup> or mm <sup>3</sup> )                                                      | Geometric | Both | FLUO |

*Note:* VIS, visible-light; FLUO, fluorescence; NIR, near-infrared; §the category of a defined phenotypic trait belonged to; \* a trait is defined based on images from side view, top view or both; ¶the type of image data used to define the trait.

**Supplemental Table 2.** Mechanistic models used for modeling biomass accumulation in this study.

Differential equations, their analytical solutions and linearized forms are presented.

| Model                                     | Differential equation                                  | Analytical solution                       | Linearized form                                                              |
|-------------------------------------------|--------------------------------------------------------|-------------------------------------------|------------------------------------------------------------------------------|
| Control plants (DAS 22-58)                |                                                        |                                           |                                                                              |
| <b>Linear</b>                             | $\frac{dy}{dt} = r$                                    | $y = y_0 + rt$                            | $y = y_0 + rt$                                                               |
| <b>Exponential</b>                        | $\frac{dy}{dt} = ry(t)$                                | $y = y_0 e^{rt}$                          | $\ln(y) = \ln(y_0) + rt$                                                     |
| <b>Monomolecular</b>                      | $\frac{dy}{dt} = r(K - y(t))$                          | $y = y_0 - (K - y_0)e^{-rt}$              | $\ln\frac{1}{K-y} = \ln\frac{1}{K-y_0} + rt$                                 |
| <b>Logistic</b>                           | $\frac{dy}{dt} = ry(t)\left(1 - \frac{y(t)}{K}\right)$ | $y = \frac{Ky_0}{y_0 + (K - y_0)e^{-rt}}$ | $\ln\frac{y}{K-y} = \ln\frac{y_0}{K-y_0} + rt$                               |
| <b>Gompertz</b>                           | $\frac{dy}{dt} = ry(t)\ln\frac{K}{y(t)}$               | $y = Ke^{\ln\frac{y_0}{K}e^{-rt}}$        | $-\ln\left[-\ln\frac{y}{K}\right] = -\ln\left[-\ln\frac{y_0}{K}\right] + rt$ |
| Stressed plants                           |                                                        |                                           |                                                                              |
| <b>Quadratic</b><br>(DAS 22-44)           | $\frac{dy}{dt} = b - 2at$                              | $y = c + bt - at^2$                       | $y = c + bt - at^2$                                                          |
| <b>Bell-shaped 1</b><br>(DAS 22-44)       | $\frac{dy}{dt} = 2Aa(t - t_{\max})e^{a(t-t_{\max})^2}$ | $y = Ae^{a(t-t_{\max})^2}$                | $\ln(y) = \ln(A) + a(t - t_{\max})^2$                                        |
| <b>Bell-shaped 2</b><br>(DAS 22-44)       | $\frac{dy}{dt} = A(b - a)t^b e^{-at}$                  | $y = At^b e^{-at}$                        | $\ln(y) = \ln(A) + b\ln(t) - at$                                             |
| <b>Bell-shaped 3</b><br>(DAS 22-44)       | $\frac{dy}{dt} = A(b - 2at)e^{bt-at^2}$                | $y = Ae^{bt-at^2}$                        | $\ln(y) = \ln(A) + bt - at^2$                                                |
| <b>Linear after stress</b><br>(DAS 45-58) | $\frac{dy}{dt} = r$                                    | $y = y_0 + rt$                            | $y = y_0 + rt$                                                               |

Note:  $y$  is the digital volume;  $t$  is the time point;  $r$  is intrinsic growth rate for control plants or re-growth rate for stressed plant in the recovery phase;  $K$  is saturation level of biomass or final biomass for control plants,  $A$  the maximum biomass under stress at time point  $t_{\max} = \frac{b}{2a}$ . Other parameters are constants.

**Supplemental Table 3.** Growth modeling of control plants.

| Plant     | Genotype | $t_{IP}$ (DAS) | Growth rate / $t_{IP}$ <sup>*</sup> | Final <sup>§1</sup> | Predicted / $t_H$ <sup>§2</sup> | Observed / $t_H$ <sup>§3</sup> | FW (g) | DW (g) |
|-----------|----------|----------------|-------------------------------------|---------------------|---------------------------------|--------------------------------|--------|--------|
| 1121KN001 | Apex     | 45.08          | 3.67                                | 6.84                | 6.51                            | 6.59                           | 117.46 | 17.57  |
| 1121KN002 | Apex     | 45.53          | 3.46                                | 6.85                | 6.43                            | 6.41                           | 112.61 | 15.53  |
| 1121KN003 | Apex     | 45.73          | 3.69                                | 7.30                | 6.83                            | 6.93                           | 117.23 | 16.11  |
| 1121KN004 | Apex     | 45.37          | 3.60                                | 7.00                | 6.60                            | 6.63                           | 111.02 | 15.4   |
| 1121KN006 | Apex     | 45.08          | 3.74                                | 7.42                | 7.00                            | 7.06                           | 110.31 | 15.59  |
| 1121KN007 | Apex     | 44.54          | 3.65                                | 7.33                | 6.94                            | 6.96                           | 113.88 | 16.18  |
| 1121KN008 | Apex     | 45.13          | 3.81                                | 7.50                | 7.08                            | 7.13                           | 115.33 | 16.08  |
| 1121KN019 | Isaria   | 46.23          | 4.48                                | 9.06                | 8.39                            | 8.57                           | 108.23 | 15.35  |
| 1121KN021 | Isaria   | 44.26          | 5.04                                | 9.58                | 9.17                            | 9.21                           | 110.51 | 16.11  |
| 1121KN022 | Isaria   | 45.28          | 5.04                                | 9.29                | 8.84                            | 8.92                           | 109.42 | 14.51  |
| 1121KN023 | Isaria   | 45.84          | 3.92                                | 7.83                | 7.31                            | 7.34                           | 99.88  | 13.46  |
| 1121KN024 | Isaria   | 45.26          | 4.75                                | 8.88                | 8.43                            | 8.51                           | 111.06 | 15.12  |
| 1121KN025 | Isaria   | 45.40          | 4.98                                | 9.28                | 8.80                            | 8.91                           | 110.66 | 15.49  |

|           |          |       |      |       |       |       |        |       |
|-----------|----------|-------|------|-------|-------|-------|--------|-------|
| 1121KN026 | Isaria   | 43.35 | 3.48 | 6.66  | 6.41  | 6.05  | 89.13  | 14.42 |
| 1121KN037 | Perun    | 44.31 | 3.15 | 6.24  | 5.93  | 5.76  | 96.79  | 16.18 |
| 1121KN038 | Perun    | 44.06 | 3.48 | 6.65  | 6.37  | 6.41  | 102.02 | 16.82 |
| 1121KN041 | Perun    | 44.73 | 3.18 | 6.29  | 5.96  | 6.05  | 94.34  | 15.38 |
| 1121KN042 | Perun    | 43.97 | 3.63 | 7.19  | 6.86  | 6.94  | 98.55  | 16.76 |
| 1121KN043 | Perun    | 44.97 | 3.76 | 7.10  | 6.75  | 6.73  | 97.79  | 15.1  |
| 1121KN044 | Perun    | 44.99 | 3.40 | 6.57  | 6.23  | 6.33  | 93.66  | 14.3  |
| 1121KN045 | Perun    | 45.60 | 3.34 | 6.65  | 6.23  | 6.28  | 93.13  | 15.01 |
| 1121KN055 | Sissy    | 44.53 | 3.16 | 6.28  | 5.96  | 5.36  | 102.4  | 10.74 |
| 1121KN056 | Sissy    | 44.58 | 3.22 | 6.49  | 6.14  | 5.65  | 97.74  | 14.5  |
| 1121KN057 | Sissy    | 44.01 | 4.20 | 8.22  | 7.86  | 6.96  | 108.8  | 16.68 |
| 1121KN058 | Sissy    | 43.30 | 3.33 | 6.51  | 6.26  | 5.75  | 99.4   | 15.11 |
| 1121KN061 | Sissy    | 43.13 | 3.68 | 6.98  | 6.74  | 6.39  | 106.02 | 16.04 |
| 1121KN062 | Sissy    | 43.76 | 3.67 | 7.34  | 7.01  | 6.40  | 106.83 | 16.66 |
| 1121KN063 | Sissy    | 43.37 | 3.40 | 6.44  | 6.21  | 5.94  | 101.38 | 15.7  |
| 1121KN073 | Trumpf   | 45.45 | 5.04 | 9.91  | 9.32  | 9.30  | 120.81 | 16.84 |
| 1121KN074 | Trumpf   | 45.11 | 5.21 | 9.97  | 9.45  | 9.26  | 121.24 | 16.91 |
| 1121KN075 | Trumpf   | 46.04 | 5.44 | 10.35 | 9.71  | 9.56  | 116.67 | 15.82 |
| 1121KN076 | Trumpf   | 44.25 | 5.02 | 9.24  | 8.88  | 8.56  | 117.02 | 17.56 |
| 1121KN078 | Trumpf   | 44.51 | 5.34 | 10.11 | 9.66  | 9.39  | 122.39 | 20.09 |
| 1121KN079 | Trumpf   | 44.44 | 4.47 | 8.62  | 8.22  | 8.22  | 119.36 | 19.12 |
| 1121KN080 | Trumpf   | 44.64 | 5.06 | 9.65  | 9.20  | 9.16  | 124.32 | 18.7  |
| 1121KN081 | Trumpf   | 44.81 | 5.46 | 10.32 | 9.83  | 9.67  | 128.34 | 19.05 |
| 1121KN091 | Franken  | 46.73 | 6.21 | 10.41 | 9.88  | 9.92  | 122.15 | 17.37 |
| 1121KN092 | Franken  | 45.25 | 5.69 | 10.94 | 10.35 | 10.18 | 127.7  | 20    |
| 1121KN093 | Franken  | 45.66 | 5.27 | 9.59  | 9.11  | 9.10  | 121.05 | 17    |
| 1121KN094 | Franken  | 44.33 | 6.39 | 12.11 | 11.59 | 11.40 | 134.46 | 21.94 |
| 1121KN095 | Franken  | 44.84 | 5.69 | 10.76 | 10.24 | 9.77  | 126.45 | 18.44 |
| 1121KN096 | Franken  | 44.22 | 6.40 | 12.03 | 11.53 | 11.28 | 138.62 | 19.82 |
| 1121KN097 | Franken  | 44.80 | 5.38 | 10.41 | 9.89  | 9.80  | 122.04 | 17.97 |
| 1121KN109 | Intensiv | 43.29 | 3.47 | 6.76  | 6.50  | 6.51  | 88.2   | 15.05 |
| 1121KN110 | Intensiv | 46.25 | 3.75 | 7.67  | 7.08  | 7.30  | 107.93 | 15.86 |
| 1121KN112 | Intensiv | 43.61 | 4.49 | 8.06  | 7.81  | 7.81  | 94.97  | 15.64 |
| 1121KN113 | Intensiv | 44.81 | 4.20 | 8.05  | 7.65  | 7.80  | 101.26 | 16.07 |
| 1121KN116 | Intensiv | 45.97 | 5.25 | 10.08 | 9.45  | 9.58  | 120.08 | 18.4  |
| 1121KN117 | Intensiv | 45.78 | 5.06 | 10.01 | 9.36  | 9.52  | 120.5  | 18.53 |
| 1121KN127 | Bavaria  | 47.14 | 4.89 | 9.91  | 9.04  | 9.42  | 123.77 | 17.2  |
| 1121KN128 | Bavaria  | 46.79 | 5.40 | 10.71 | 9.87  | 10.22 | 126.59 | 17.91 |
| 1121KN129 | Bavaria  | 45.71 | 5.89 | 10.74 | 10.19 | 10.37 | 126.2  | 18.64 |
| 1121KN131 | Bavaria  | 46.31 | 5.09 | 9.69  | 9.06  | 9.20  | 120.93 | 17.57 |
| 1121KN132 | Bavaria  | 46.38 | 6.07 | 11.65 | 10.87 | 11.16 | 125.78 | 18.11 |
| 1121KN145 | BarkeCS  | 46.03 | 6.40 | 12.01 | 11.30 | 11.52 | 143.7  | 19.97 |
| 1121KN146 | BarkeCS  | 47.09 | 6.03 | 11.56 | 10.67 | 10.94 | 132.18 | 16.58 |
| 1121KN147 | BarkeCS  | 47.12 | 5.09 | 9.80  | 9.03  | 9.30  | 127.15 | 14.84 |

|           |          |       |      |       |       |       |        |       |
|-----------|----------|-------|------|-------|-------|-------|--------|-------|
| 1121KN148 | BarkeCS  | 46.33 | 6.27 | 12.10 | 11.28 | 11.60 | 137.88 | 19.01 |
| 1121KN149 | BarkeCS  | 47.40 | 5.18 | 9.98  | 9.16  | 9.49  | 130.68 | 15.84 |
| 1121KN150 | BarkeCS  | 47.52 | 6.77 | 13.05 | 11.95 | 12.32 | 123.76 | 15.92 |
| 1121KN151 | BarkeCS  | 47.09 | 5.31 | 10.06 | 9.31  | 9.56  | 143.93 | 18.64 |
| 1121KN153 | BarkeCS  | 47.53 | 5.06 | 9.39  | 8.66  | 8.89  | 122.22 | 15.48 |
| 1121KN163 | Beatrix  | 45.98 | 3.86 | 7.78  | 7.24  | 7.41  | 103.56 | 16.49 |
| 1121KN164 | Beatrix  | 46.59 | 5.60 | 10.57 | 9.86  | 10.08 | 119.03 | 18.45 |
| 1121KN165 | Beatrix  | 46.19 | 4.94 | 9.63  | 8.98  | 9.14  | 123.44 | 18.64 |
| 1121KN166 | Beatrix  | 45.93 | 4.70 | 9.04  | 8.48  | 8.67  | 116.26 | 17.91 |
| 1121KN167 | Beatrix  | 46.26 | 5.33 | 10.00 | 9.38  | 9.51  | 120.82 | 19.08 |
| 1121KN169 | Beatrix  | 45.06 | 5.17 | 9.98  | 9.45  | 9.61  | 120.91 | 20.26 |
| 1121KN171 | Beatrix  | 46.66 | 5.53 | 10.26 | 9.59  | 9.77  | 124.1  | 19.45 |
| 1121KN181 | Djamilia | 45.18 | 4.05 | 7.80  | 7.38  | 7.43  | 115.31 | 17.91 |
| 1121KN182 | Djamilia | 46.43 | 4.00 | 7.00  | 6.62  | 6.75  | 106.38 | 15.85 |
| 1121KN183 | Djamilia | 46.65 | 3.68 | 6.80  | 6.36  | 6.43  | 110.46 | 15.9  |
| 1121KN184 | Djamilia | 45.41 | 3.49 | 6.79  | 6.40  | 6.54  | 108.28 | 15.87 |
| 1121KN185 | Djamilia | 45.63 | 4.34 | 8.22  | 7.76  | 7.86  | 117.15 | 17.12 |
| 1121KN186 | Djamilia | 44.36 | 3.28 | 6.37  | 6.07  | 6.12  | 99.21  | 15.51 |
| 1121KN188 | Djamilia | 43.56 | 3.34 | 5.98  | 5.80  | 5.86  | 91.95  | 14.47 |
| 1121KN189 | Djamilia | 45.26 | 3.53 | 6.81  | 6.44  | 6.57  | 107.43 | 15.75 |
| 1121KN199 | Eunova   | 43.23 | 2.77 | 5.24  | 5.06  | 5.12  | 90.5   | 14.55 |
| 1121KN200 | Eunova   | 43.81 | 2.94 | 5.51  | 5.30  | 5.39  | 91.71  | 14.24 |
| 1121KN201 | Eunova   | 42.99 | 3.14 | 5.55  | 5.40  | 5.42  | 91     | 13.78 |
| 1121KN203 | Eunova   | 43.48 | 3.10 | 5.75  | 5.55  | 5.63  | 93.02  | 14.23 |
| 1121KN204 | Eunova   | 43.18 | 3.34 | 6.09  | 5.90  | 5.96  | 95.29  | 14.75 |
| 1121KN205 | Eunova   | 44.90 | 2.81 | 5.50  | 5.21  | 5.25  | 85.51  | 13.15 |
| 1121KN206 | Eunova   | 43.59 | 2.67 | 5.09  | 4.90  | 4.97  | 89.49  | 14.47 |
| 1121KN207 | Eunova   | 44.33 | 3.67 | 6.30  | 6.10  | 6.18  | 103.1  | 15.99 |
| 1121KN217 | Streif   | 46.24 | 5.02 | 10.07 | 9.33  | 9.57  | 127.28 | 18.92 |
| 1121KN218 | Streif   | 45.86 | 4.22 | 8.15  | 7.65  | 7.78  | 113.38 | 16.26 |
| 1121KN219 | Streif   | 45.82 | 3.91 | 7.76  | 7.25  | 7.39  | 109.63 | 15.92 |
| 1121KN220 | Streif   | 46.16 | 4.93 | 9.44  | 8.84  | 9.07  | 125.79 | 18.4  |
| 1121KN221 | Streif   | 45.80 | 5.25 | 10.48 | 9.78  | 9.98  | 131.14 | 20.85 |
| 1121KN222 | Streif   | 45.76 | 3.89 | 7.78  | 7.27  | 7.41  | 112.23 | 16.57 |
| 1121KN223 | Streif   | 46.52 | 5.42 | 10.94 | 10.09 | 10.45 | 131.33 | 19.61 |
| 1121KN224 | Streif   | 46.10 | 4.80 | 9.31  | 8.70  | 8.94  | 120.1  | 17.35 |
| 1121KN225 | Streif   | 46.93 | 5.07 | 10.01 | 9.21  | 9.52  | 123.58 | 18.31 |
| 1121KN235 | Ursa     | 45.50 | 4.53 | 9.03  | 8.47  | 8.54  | 118.53 | 19.11 |
| 1121KN236 | Ursa     | 45.57 | 3.89 | 7.76  | 7.26  | 7.39  | 110.56 | 16.23 |
| 1121KN237 | Ursa     | 46.07 | 3.53 | 6.90  | 6.44  | 6.39  | 101.84 | 14.51 |
| 1121KN239 | Ursa     | 45.52 | 3.30 | 6.61  | 6.19  | 6.24  | 98.7   | 14.13 |
| 1121KN240 | Ursa     | 45.35 | 3.85 | 7.59  | 7.14  | 7.05  | 105.36 | 15.78 |
| 1121KN241 | Ursa     | 46.07 | 3.21 | 6.48  | 6.02  | 5.99  | 93.67  | 13.21 |
| 1121KN242 | Ursa     | 45.26 | 4.39 | 8.59  | 8.10  | 8.10  | 113.12 | 17.55 |

|           |            |       |      |       |       |       |        |       |
|-----------|------------|-------|------|-------|-------|-------|--------|-------|
| 1121KN243 | Ursa       | 45.87 | 3.05 | 6.15  | 5.72  | 5.78  | 92     | 13.8  |
| 1121KN253 | Victoriana | 45.69 | 4.61 | 8.78  | 8.27  | 8.20  | 118.33 | 17.02 |
| 1121KN254 | Victoriana | 46.20 | 4.81 | 9.39  | 8.76  | 8.73  | 119.47 | 16.76 |
| 1121KN255 | Victoriana | 45.42 | 4.00 | 7.72  | 7.28  | 7.12  | 110.58 | 15.73 |
| 1121KN256 | Victoriana | 46.76 | 4.41 | 8.50  | 7.88  | 7.89  | 110.22 | 15.34 |
| 1121KN259 | Victoriana | 45.54 | 5.09 | 9.61  | 9.09  | 9.12  | 123.25 | 18.51 |
| 1121KN260 | Victoriana | 44.84 | 5.66 | 10.41 | 9.95  | 10.04 | 134.1  | 22.22 |
| 1121KN261 | Victoriana | 46.19 | 4.48 | 8.65  | 8.08  | 8.28  | 119.15 | 18.63 |
| 1121KN271 | Wiebke     | 46.09 | 3.83 | 7.46  | 6.97  | 7.09  | 108.76 | 16.34 |
| 1121KN273 | Wiebke     | 46.31 | 4.33 | 8.94  | 8.24  | 8.45  | 121.41 | 18.1  |
| 1121KN274 | Wiebke     | 45.75 | 3.80 | 7.47  | 7.00  | 7.10  | 112.77 | 16.5  |
| 1121KN275 | Wiebke     | 46.59 | 3.98 | 7.87  | 7.28  | 7.37  | 110.85 | 16.21 |
| 1121KN276 | Wiebke     | 44.70 | 2.84 | 5.81  | 5.48  | 5.57  | 89.61  | 14.5  |
| 1121KN278 | Wiebke     | 45.73 | 4.01 | 7.84  | 7.35  | 7.47  | 113.94 | 16.95 |
| 1121KN279 | Wiebke     | 46.77 | 2.75 | 5.67  | 5.19  | 5.30  | 84.88  | 12.3  |
| 1121KN289 | MorexPE    | 43.87 | 3.35 | 6.54  | 6.26  | 6.29  | 100.46 | 15.87 |
| 1121KN290 | MorexPE    | 44.48 | 4.01 | 7.66  | 7.32  | 7.42  | 102.61 | 15.78 |
| 1121KN291 | MorexPE    | 44.94 | 4.02 | 7.52  | 7.17  | 7.10  | 101.42 | 14.6  |
| 1121KN292 | MorexPE    | 43.57 | 3.69 | 7.31  | 7.00  | 6.96  | 116.4  | 16.39 |
| 1121KN293 | MorexPE    | 45.30 | 4.27 | 8.56  | 8.04  | 8.07  | 108.34 | 16.88 |
| 1121KN301 | BarkePE    | 46.79 | 5.52 | 10.53 | 9.77  | 9.92  | 135.97 | 19.12 |
| 1121KN302 | BarkePE    | 47.71 | 5.96 | 11.04 | 10.15 | 10.30 | 127.25 | 17.16 |
| 1121KN304 | BarkePE    | 46.97 | 6.01 | 11.29 | 10.48 | 10.68 | 140.35 | 18.29 |
| 1121KN306 | BarkePE    | 46.49 | 5.90 | 11.53 | 10.70 | 10.79 | 141.54 | 20.34 |
| 1121KN001 | Apex       | 45.08 | 3.67 | 6.84  | 6.51  | 6.59  | 117.46 | 17.57 |
| 1121KN002 | Apex       | 45.53 | 3.46 | 6.85  | 6.43  | 6.41  | 112.61 | 15.53 |

Note:  $t_{IP}$ , time of inflection points (plants with maximum growth rate);  $t_H$ , the time point for plant harvesting; FW, fresh weight; DW, dry weight;  $^{\S}$ digital volumes of plants ( $\times 10^7$  px<sup>3</sup>);  $^*$ the maximum growth rate ( $\times 10^6$  px<sup>3</sup>/day);  $^1$ the final biomass estimated from the logistic model;  $^2$ the predicted biomass from the logistic model at time  $t_H$ ;  $^3$ the predicted biomass from image data at time  $t_H$ .

**Supplemental Table 4.** Growth modeling of stressed plants.

| Plant     | Genotype | $t_{max}$ (DAS) | Observed/ $t_{max}^{\S 1}$ | Predicted/ $t_{max}^{\S 2}$ | Growth rate/LM <sup>3</sup> | Predicted/ $t_H^{\S 4}$ | FW (g) | DW (g) |
|-----------|----------|-----------------|----------------------------|-----------------------------|-----------------------------|-------------------------|--------|--------|
| 1121KN010 | Apex     | 38.75           | 1.10                       | 1.09                        | 1.78                        | 3.27                    | 56.98  | 7.14   |
| 1121KN011 | Apex     | 36.46           | 1.17                       | 1.04                        | 1.89                        | 3.11                    | 55.35  | 7.18   |
| 1121KN012 | Apex     | 44.20           | 0.89                       | 1.05                        | 1.20                        | 2.68                    | 60.82  | 7.93   |
| 1121KN013 | Apex     | 37.19           | 1.10                       | 1.02                        | 1.79                        | 3.07                    | 59.01  | 7.44   |
| 1121KN014 | Apex     | 39.17           | 0.88                       | 0.86                        | 1.49                        | 2.73                    | 57.15  | 7.36   |
| 1121KN015 | Apex     | 38.17           | 1.09                       | 1.04                        | 1.77                        | 3.25                    | 62.39  | 7.73   |

|           |         |       |      |      |      |      |       |      |
|-----------|---------|-------|------|------|------|------|-------|------|
| 1121KN016 | Apex    | 37.74 | 1.09 | 1.00 | 1.88 | 3.24 | 61.11 | 7.7  |
| 1121KN017 | Apex    | 37.57 | 0.99 | 0.91 | 1.75 | 2.96 | 56.37 | 6.97 |
| 1121KN018 | Apex    | 39.71 | 1.07 | 1.04 | 1.78 | 3.29 | 61.25 | 7.54 |
| 1121KN028 | Isaria  | 38.20 | 1.18 | 1.08 | 2.63 | 4.57 | 69.81 | 9.3  |
| 1121KN029 | Isaria  | 37.73 | 1.21 | 1.09 | 3.08 | 5.10 | 73.44 | 9.09 |
| 1121KN030 | Isaria  | 39.81 | 1.11 | 1.04 | 2.37 | 4.21 | 70.77 | 8.89 |
| 1121KN031 | Isaria  | 38.88 | 1.17 | 1.12 | 2.37 | 4.39 | 59.92 | 8.83 |
| 1121KN032 | Isaria  | 39.05 | 1.13 | 1.08 | 2.56 | 4.53 | 67.61 | 8.9  |
| 1121KN033 | Isaria  | 38.94 | 1.18 | 1.11 | 2.98 | 5.09 | 74.42 | 8.79 |
| 1121KN034 | Isaria  | 37.56 | 1.21 | 1.06 | 2.42 | 4.24 | 69.17 | 8.77 |
| 1121KN035 | Isaria  | 37.36 | 1.38 | 1.13 | 2.77 | 4.75 | 72.65 | 8.92 |
| 1121KN036 | Isaria  | 38.65 | 1.10 | 1.04 | 1.93 | 3.66 | 58.85 | 8.36 |
| 1121KN046 | Perun   | 39.23 | 1.18 | 1.19 | 1.34 | 2.92 | 53.33 | 7.66 |
| 1121KN047 | Perun   | 39.12 | 1.14 | 1.08 | 0.68 | 2.00 | 46.23 | 7.48 |
| 1121KN048 | Perun   | 38.87 | 1.05 | 1.05 | 0.86 | 2.22 | 48.73 | 7.71 |
| 1121KN049 | Perun   | 40.28 | 1.11 | 1.07 | 0.41 | 1.76 | 37.54 | 7.93 |
| 1121KN050 | Perun   | 39.73 | 1.45 | 1.29 | 1.79 | 3.72 | 62.94 | 9.24 |
| 1121KN051 | Perun   | 38.97 | 0.99 | 0.96 | 0.82 | 2.04 | 48.09 | 7.19 |
| 1121KN052 | Perun   | 39.17 | 1.06 | 0.98 | 0.96 | 2.23 | 52.56 | 8.34 |
| 1121KN053 | Perun   | 39.92 | 1.03 | 0.97 | 1.05 | 2.40 | 53.78 | 8.46 |
| 1121KN054 | Perun   | 39.07 | 1.14 | 1.09 | 1.01 | 2.42 | 51.63 | 8.02 |
| 1121KN064 | Sissy   | 37.93 | 1.13 | 1.06 | 1.05 | 2.38 | 51.31 | 7.63 |
| 1121KN065 | Sissy   | 37.74 | 1.14 | 1.05 | 1.14 | 2.54 | 53.06 | 7.94 |
| 1121KN066 | Sissy   | 39.60 | 1.05 | 1.05 | 0.98 | 2.36 | 53.31 | 7.92 |
| 1121KN067 | Sissy   | 37.40 | 1.28 | 1.18 | 1.05 | 2.39 | 53.24 | 7.77 |
| 1121KN068 | Sissy   | 38.95 | 1.10 | 1.04 | 1.34 | 2.80 | 56.35 | 7.98 |
| 1121KN069 | Sissy   | 37.88 | 1.06 | 1.02 | 0.91 | 2.09 | 48.27 | 7.12 |
| 1121KN070 | Sissy   | 38.42 | 1.14 | 1.08 | 0.93 | 2.25 | 47.22 | 7.29 |
| 1121KN071 | Sissy   | 37.65 | 1.22 | 1.14 | 1.47 | 3.04 | 58.14 | 7.91 |
| 1121KN072 | Sissy   | 38.59 | 1.10 | 1.07 | 1.01 | 2.44 | 47.18 | 7.07 |
| 1121KN082 | Trumpf  | 38.75 | 1.21 | 1.19 | 1.98 | 3.88 | 65.97 | 8.42 |
| 1121KN083 | Trumpf  | 38.55 | 1.31 | 1.22 | 2.05 | 3.99 | 65.94 | 8.57 |
| 1121KN084 | Trumpf  | 40.83 | 1.18 | 1.19 | 2.41 | 4.46 | 67.62 | 8.67 |
| 1121KN085 | Trumpf  | 40.78 | 1.12 | 1.14 | 1.55 | 3.30 | 62.33 | 8.22 |
| 1121KN086 | Trumpf  | 38.94 | 1.22 | 1.21 | 2.46 | 4.48 | 75.39 | 9.47 |
| 1121KN087 | Trumpf  | 42.31 | 1.16 | 1.19 | 1.79 | 3.71 | 65.63 | 9.05 |
| 1121KN088 | Trumpf  | 38.55 | 1.38 | 1.25 | 2.10 | 3.94 | 67.17 | 8.82 |
| 1121KN089 | Trumpf  | 40.02 | 1.24 | 1.18 | 2.28 | 4.25 | 69.96 | 9.18 |
| 1121KN090 | Trumpf  | 38.12 | 1.34 | 1.26 | 2.33 | 4.32 | 66.84 | 8.63 |
| 1121KN100 | Franken | 38.52 | 1.14 | 1.02 | 1.56 | 3.04 | 57.96 | 7.32 |
| 1121KN101 | Franken | 38.62 | 1.05 | 0.95 | 1.98 | 3.60 | 65.15 | 8.38 |
| 1121KN102 | Franken | 38.61 | 1.11 | 0.99 | 2.46 | 4.18 | 69.46 | 8.72 |
| 1121KN103 | Franken | 37.37 | 1.21 | 1.13 | 2.42 | 4.13 | 65.64 | 8.52 |
| 1121KN104 | Franken | 40.67 | 1.03 | 0.99 | 2.36 | 4.17 | 73.45 | 9.6  |



|           |          |       |      |      |      |      |       |       |
|-----------|----------|-------|------|------|------|------|-------|-------|
| 1121KN105 | Franken  | 37.57 | 1.15 | 1.07 | 1.86 | 3.59 | 70.88 | 9.45  |
| 1121KN106 | Franken  | 42.38 | 1.23 | 1.11 | 2.16 | 4.21 | 74.58 | 9.98  |
| 1121KN107 | Franken  | 42.51 | 1.07 | 0.97 | 2.30 | 4.18 | 77.82 | 9.66  |
| 1121KN108 | Franken  | 37.96 | 1.25 | 1.19 | 2.27 | 4.19 | 70.67 | 8.9   |
| 1121KN118 | Intensiv | 37.52 | 1.38 | 1.31 | 2.50 | 4.60 | 74.68 | 9.59  |
| 1121KN119 | Intensiv | 39.55 | 1.10 | 1.12 | 2.06 | 4.00 | 73.06 | 9.8   |
| 1121KN121 | Intensiv | 37.86 | 1.22 | 1.17 | 2.41 | 4.27 | 70.4  | 9.48  |
| 1121KN122 | Intensiv | 40.58 | 1.06 | 1.00 | 2.08 | 3.89 | 69.15 | 9.16  |
| 1121KN123 | Intensiv | 40.77 | 1.17 | 1.07 | 1.88 | 3.83 | 70.34 | 9.59  |
| 1121KN124 | Intensiv | 40.35 | 1.08 | 1.03 | 2.35 | 4.36 | 73.95 | 9.77  |
| 1121KN125 | Intensiv | 38.40 | 1.18 | 1.17 | 2.50 | 4.42 | 76.42 | 9.42  |
| 1121KN126 | Intensiv | 38.91 | 1.12 | 1.10 | 2.20 | 4.04 | 72.05 | 9.05  |
| 1121KN136 | Bavaria  | 39.32 | 1.12 | 1.02 | 2.09 | 3.91 | 65.07 | 7.74  |
| 1121KN137 | Bavaria  | 47.31 | 1.17 | 0.94 | 1.42 | 2.78 | 55.19 | 6.39  |
| 1121KN138 | Bavaria  | 39.29 | 1.06 | 0.98 | 1.61 | 3.40 | 62.9  | 7.85  |
| 1121KN139 | Bavaria  | 38.82 | 1.06 | 1.01 | 2.01 | 3.88 | 64.06 | 7.95  |
| 1121KN140 | Bavaria  | 41.07 | 1.20 | 1.10 | 1.86 | 3.81 | 59.14 | 7.74  |
| 1121KN141 | Bavaria  | 37.15 | 1.36 | 1.22 | 2.75 | 4.74 | 66.95 | 8.43  |
| 1121KN142 | Bavaria  | 40.51 | 1.09 | 1.01 | 2.01 | 3.89 | 65.11 | 8.14  |
| 1121KN143 | Bavaria  | 38.66 | 1.10 | 1.05 | 2.45 | 4.43 | 68    | 8.27  |
| 1121KN144 | Bavaria  | 37.82 | 1.34 | 1.21 | 2.36 | 4.27 | 63.01 | 7.96  |
| 1121KN154 | BarkeCS  | 40.53 | 1.16 | 1.07 | 1.97 | 3.93 | 68.76 | 8.42  |
| 1121KN155 | BarkeCS  | 40.72 | 1.22 | 1.11 | 1.92 | 3.84 | 71.7  | 8.7   |
| 1121KN156 | BarkeCS  | 39.20 | 1.13 | 1.08 | 2.00 | 3.74 | 73.13 | 9.31  |
| 1121KN157 | BarkeCS  | 39.45 | 1.15 | 1.07 | 1.79 | 3.38 | 72.31 | 9.63  |
| 1121KN158 | BarkeCS  | 40.19 | 1.23 | 1.17 | 1.93 | 3.76 | 78.88 | 9.91  |
| 1121KN159 | BarkeCS  | 40.55 | 1.13 | 1.12 | 2.16 | 4.15 | 76.11 | 9.88  |
| 1121KN160 | BarkeCS  | 42.16 | 1.09 | 1.09 | 1.91 | 3.71 | 74.25 | 9.47  |
| 1121KN161 | BarkeCS  | 41.74 | 1.11 | 1.07 | 1.69 | 3.46 | 70.18 | 9.11  |
| 1121KN162 | BarkeCS  | 41.36 | 1.09 | 1.08 | 2.10 | 4.02 | 73.94 | 9.3   |
| 1121KN172 | Beatrix  | 46.73 | 1.54 | 1.20 | 1.50 | 3.34 | 64.43 | 9.24  |
| 1121KN173 | Beatrix  | 40.67 | 1.26 | 1.25 | 1.73 | 3.92 | 71.99 | 10.59 |
| 1121KN174 | Beatrix  | 41.02 | 1.23 | 1.22 | 1.86 | 4.04 | 75.13 | 10.56 |
| 1121KN175 | Beatrix  | 41.15 | 1.19 | 1.16 | 1.71 | 3.80 | 71.28 | 9.93  |
| 1121KN176 | Beatrix  | 40.63 | 1.18 | 1.19 | 1.68 | 3.66 | 69.57 | 9.75  |
| 1121KN177 | Beatrix  | 47.03 | 1.72 | 1.42 | 1.38 | 3.38 | 69.87 | 9.68  |
| 1121KN178 | Beatrix  | 40.15 | 1.32 | 1.31 | 2.07 | 4.31 | 77.03 | 10.59 |
| 1121KN179 | Beatrix  | 40.90 | 1.32 | 1.31 | 1.97 | 4.26 | 74.69 | 10.54 |
| 1121KN180 | Beatrix  | 41.96 | 1.21 | 1.20 | 1.57 | 3.61 | 70.1  | 9.96  |
| 1121KN190 | Djamilia | 40.00 | 0.96 | 1.00 | 1.54 | 3.30 | 67.13 | 8.84  |
| 1121KN191 | Djamilia | 44.14 | 0.99 | 1.02 | 1.48 | 3.20 | 66.37 | 8.85  |
| 1121KN192 | Djamilia | 39.18 | 1.05 | 1.01 | 1.51 | 3.08 | 64.79 | 8.69  |
| 1121KN193 | Djamilia | 40.30 | 1.07 | 1.07 | 1.64 | 3.39 | 70.1  | 9.25  |
| 1121KN194 | Djamilia | 39.27 | 1.00 | 0.99 | 1.41 | 3.04 | 62.31 | 8.55  |

|           |            |       |      |      |      |      |       |       |
|-----------|------------|-------|------|------|------|------|-------|-------|
| 1121KN195 | Djamilia   | 39.24 | 0.95 | 0.92 | 1.55 | 3.22 | 65.15 | 8.84  |
| 1121KN196 | Djamilia   | 38.65 | 1.08 | 1.02 | 1.54 | 3.16 | 64.29 | 8.57  |
| 1121KN197 | Djamilia   | 46.20 | 1.41 | 1.23 | 1.44 | 3.37 | 67.55 | 9.24  |
| 1121KN198 | Djamilia   | 43.35 | 1.00 | 0.98 | 1.16 | 2.85 | 59.67 | 8.14  |
| 1121KN208 | Eunova     | 41.56 | 0.84 | 0.84 | 1.18 | 2.59 | 52.58 | 8.23  |
| 1121KN209 | Eunova     | 37.48 | 1.15 | 1.09 | 1.29 | 2.87 | 59.16 | 8.78  |
| 1121KN210 | Eunova     | 38.23 | 1.10 | 1.08 | 1.41 | 3.10 | 55.77 | 8.45  |
| 1121KN211 | Eunova     | 37.91 | 1.05 | 0.97 | 0.99 | 2.41 | 49.3  | 7.76  |
| 1121KN212 | Eunova     | 42.39 | 0.91 | 0.89 | 0.82 | 2.12 | 48.47 | 7.46  |
| 1121KN213 | Eunova     | 39.34 | 0.97 | 0.95 | 0.68 | 2.02 | 45.32 | 7.48  |
| 1121KN214 | Eunova     | 41.63 | 1.05 | 1.05 | 0.77 | 2.35 | 46.51 | 7.73  |
| 1121KN215 | Eunova     | 39.50 | 0.97 | 0.97 | 0.93 | 2.46 | 49.15 | 7.72  |
| 1121KN216 | Eunova     | 38.28 | 1.00 | 1.01 | 1.01 | 2.47 | 46.77 | 7.37  |
| 1121KN226 | Streif     | 44.00 | 1.14 | 1.16 | 1.19 | 2.91 | 59.01 | 8.57  |
| 1121KN227 | Streif     | 41.06 | 1.23 | 1.25 | 1.33 | 3.33 | 65.21 | 9.59  |
| 1121KN228 | Streif     | 39.71 | 1.24 | 1.22 | 1.79 | 3.59 | 71.17 | 9.23  |
| 1121KN229 | Streif     | 43.46 | 1.46 | 1.42 | 1.58 | 3.79 | 72.91 | 9.72  |
| 1121KN230 | Streif     | 46.60 | 1.85 | 1.47 | 1.97 | 4.24 | 76.42 | 9.75  |
| 1121KN231 | Streif     | 39.57 | 1.46 | 1.43 | 1.85 | 4.22 | 77.24 | 9.96  |
| 1121KN232 | Streif     | 39.66 | 1.39 | 1.34 | 1.56 | 3.64 | 71.89 | 9.76  |
| 1121KN233 | Streif     | 39.79 | 1.28 | 1.24 | 1.69 | 3.71 | 73.13 | 9.42  |
| 1121KN234 | Streif     | 39.10 | 1.19 | 1.18 | 1.83 | 3.68 | 71.98 | 9.83  |
| 1121KN244 | Ursa       | 39.22 | 1.28 | 1.23 | 2.08 | 4.46 | 75.23 | 10.11 |
| 1121KN245 | Ursa       | 38.25 | 1.23 | 1.18 | 2.04 | 4.23 | 75.16 | 10.03 |
| 1121KN246 | Ursa       | 40.19 | 0.99 | 0.97 | 1.46 | 3.37 | 61.19 | 9.05  |
| 1121KN247 | Ursa       | 38.16 | 1.10 | 1.08 | 1.82 | 3.95 | 73.79 | 9.93  |
| 1121KN248 | Ursa       | 39.06 | 1.11 | 1.10 | 1.87 | 3.91 | 70.89 | 9.58  |
| 1121KN249 | Ursa       | 39.91 | 1.08 | 1.03 | 1.67 | 3.58 | 68.15 | 9.25  |
| 1121KN250 | Ursa       | 38.33 | 1.21 | 1.21 | 2.08 | 4.21 | 72.68 | 9.62  |
| 1121KN251 | Ursa       | 41.48 | 1.04 | 0.96 | 1.48 | 3.29 | 61.66 | 8.58  |
| 1121KN252 | Ursa       | 41.45 | 1.06 | 1.00 | 1.45 | 3.25 | 62.55 | 8.39  |
| 1121KN262 | Victoriana | 43.32 | 1.14 | 1.17 | 1.31 | 3.19 | 60.31 | 8.64  |
| 1121KN263 | Victoriana | 41.47 | 1.20 | 1.20 | 1.50 | 3.37 | 65.29 | 8.78  |
| 1121KN264 | Victoriana | 41.50 | 1.15 | 1.12 | 1.23 | 2.91 | 56.62 | 8.18  |
| 1121KN265 | Victoriana | 42.61 | 1.17 | 1.19 | 1.46 | 3.30 | 62.76 | 8.64  |
| 1121KN266 | Victoriana | 43.22 | 1.08 | 1.09 | 1.26 | 3.00 | 56.93 | 8.4   |
| 1121KN267 | Victoriana | 43.29 | 0.98 | 1.04 | 1.40 | 3.03 | 59.57 | 8.25  |
| 1121KN268 | Victoriana | 42.49 | 1.22 | 1.23 | 1.55 | 3.43 | 63.21 | 8.71  |
| 1121KN269 | Victoriana | 40.97 | 1.28 | 1.28 | 1.73 | 3.61 | 68.97 | 8.7   |
| 1121KN270 | Victoriana | 41.73 | 1.37 | 1.37 | 1.68 | 3.77 | 65.88 | 8.99  |
| 1121KN280 | Wiebke     | 38.87 | 1.06 | 1.00 | 1.19 | 2.67 | 55.56 | 7.9   |
| 1121KN281 | Wiebke     | 39.78 | 1.13 | 1.08 | 1.28 | 2.86 | 56.66 | 8.23  |
| 1121KN282 | Wiebke     | 40.40 | 1.07 | 1.02 | 1.19 | 2.69 | 56.66 | 8.28  |
| 1121KN283 | Wiebke     | 43.46 | 0.98 | 1.04 | 1.02 | 2.57 | 56.97 | 8.46  |

|           |         |       |      |      |      |      |       |      |
|-----------|---------|-------|------|------|------|------|-------|------|
| 1121KN284 | Wiebke  | 40.53 | 0.97 | 0.97 | 1.17 | 2.71 | 55.75 | 8.1  |
| 1121KN285 | Wiebke  | 38.71 | 1.14 | 1.06 | 1.25 | 2.72 | 57.25 | 8.58 |
| 1121KN286 | Wiebke  | 37.54 | 1.37 | 1.23 | 1.57 | 3.07 | 61.23 | 8.72 |
| 1121KN287 | Wiebke  | 40.58 | 0.99 | 0.97 | 1.10 | 2.53 | 54.48 | 8.47 |
| 1121KN288 | Wiebke  | 40.84 | 1.03 | 1.01 | 1.18 | 2.74 | 55.56 | 8.15 |
| 1121KN295 | MorexPE | 42.98 | 1.24 | 1.26 | 1.05 | 2.85 | 50.26 | 8.11 |
| 1121KN296 | MorexPE | 41.45 | 1.50 | 1.50 | 0.88 | 2.85 | 49.89 | 8.86 |
| 1121KN297 | MorexPE | 42.24 | 1.53 | 1.49 | 1.16 | 3.19 | 51.89 | 8.86 |
| 1121KN298 | MorexPE | 39.18 | 1.62 | 1.50 | 0.71 | 2.48 | 44.28 | 7.38 |
| 1121KN299 | MorexPE | 40.06 | 1.30 | 1.25 | 0.84 | 2.47 | 42.75 | 7.69 |
| 1121KN300 | MorexPE | 41.51 | 1.37 | 1.35 | 1.10 | 2.98 | 51.97 | 8.25 |
| 1121KN307 | BarkePE | 39.28 | 1.30 | 1.21 | 2.30 | 4.23 | 73.99 | 9.02 |
| 1121KN308 | BarkePE | 41.37 | 1.12 | 1.11 | 1.98 | 3.86 | 72.86 | 8.79 |
| 1121KN309 | BarkePE | 41.83 | 1.15 | 1.13 | 2.13 | 4.10 | 76.58 | 9.21 |
| 1121KN310 | BarkePE | 39.07 | 1.26 | 1.19 | 2.56 | 4.58 | 77.87 | 9.09 |
| 1121KN311 | BarkePE | 39.17 | 1.26 | 1.15 | 2.49 | 4.49 | 78.55 | 9.58 |
| 1121KN312 | BarkePE | 39.59 | 1.20 | 1.12 | 2.15 | 3.99 | 76.18 | 9.79 |

Note:  $t_{\max} = \frac{b}{2a}$ , the time point that plants reach maximum biomass, estimated from the bell-shaped model;

$t_H$ , the time point for plant harvesting; FW, fresh weight; DW, dry weight;  $\delta$  digital volumes of plants ( $\times 10^7 \text{ px}^3$ );

<sup>1</sup>the predicted biomass from image data at time  $t_{\max}$ ; <sup>2</sup>the predicted biomass from image data at time  $t_{\max}$ ;

<sup>3</sup>growth rate (slope;  $\times 10^6 \text{ px}^3/\text{day}$ ) detected from the linear model (LM); <sup>4</sup>the predicted biomass from image data at time  $t_H$ .

## Supplemental References

**Abo-Elwafa A, Bakheit B** (1999) Performance, correlation and path coefficient analysis in faba bean.

Assiut J. Agric. Sci.: 77-91

**Araghi SG, Assad MT** (1998) Evaluation of four screening techniques for drought resistance and their relationship to yield reduction ratio in wheat. *Euphytica* **103**: 293-299

**Bousslama M, Schapaugh WT** (1984) Stress Tolerance in Soybeans. I. Evaluation of Three Screening Techniques for Heat and Drought Tolerance1. *Crop Sci.* **24**: 933-937

**Fereres E, Gimenez C, Fernandez JM** (1986) Genetic-Variability in Sunflower Cultivars under Drought .1. Yield Relationships. *Australian Journal of Agricultural Research* **37**: 573-582

**Fernandez GCJ** (1992) Effective selection criteria for assessing stress tolerance, Taiwan

**Fischer RA, Maurer R** (1978) Drought Resistance in Spring Wheat Cultivars .1. Grain-Yield

Supplemental Data. Chen *et al.* (2014). *Plant Cell* 10.1105/tpc.114.129601

Responses. *Australian Journal of Agricultural Research* **29**: 897-912

**Gavuzzi P, Rizza F, Palumbo M, Campanile RG, Ricciardi GL, Borghi B** (1997) Evaluation of field and laboratory predictors of drought and heat tolerance in winter cereals. *Canadian Journal of Plant Science* **77**: 523-531

**Hossain ABS, Sears RG, Cox TS, Paulsen GM** (1990) Desiccation Tolerance and Its Relationship to Assimilate Partitioning in Winter-Wheat. *Crop Science* **30**: 622-627

**Lin CS, Binns MR, Lefkovitch LP** (1986) Stability Analysis - Where Do We Stand. *Crop Science* **26**: 894-900

**Rosielle AA, Hamblin J** (1981) Theoretical Aspects of Selection for Yield in Stress and Non-Stress Environments. *Crop Science* **21**: 943-946
